# Supplementary material
Source: MDPI journal article supplement (https://www.mdpi.com/2227-9717/6/5/50)
Supplement: s1 [file s1]

# Supplementary Materials: Membrane Fouling Characteristics of a Side-Stream Tubular Anaerobic Membrane Bioreactor (AnMBR) Treating Domestic Wastewater

Nsanzumukiza Martin Vincent, Juan Tong, Dawei Yu, Junya Zhang and Yuansong Wei

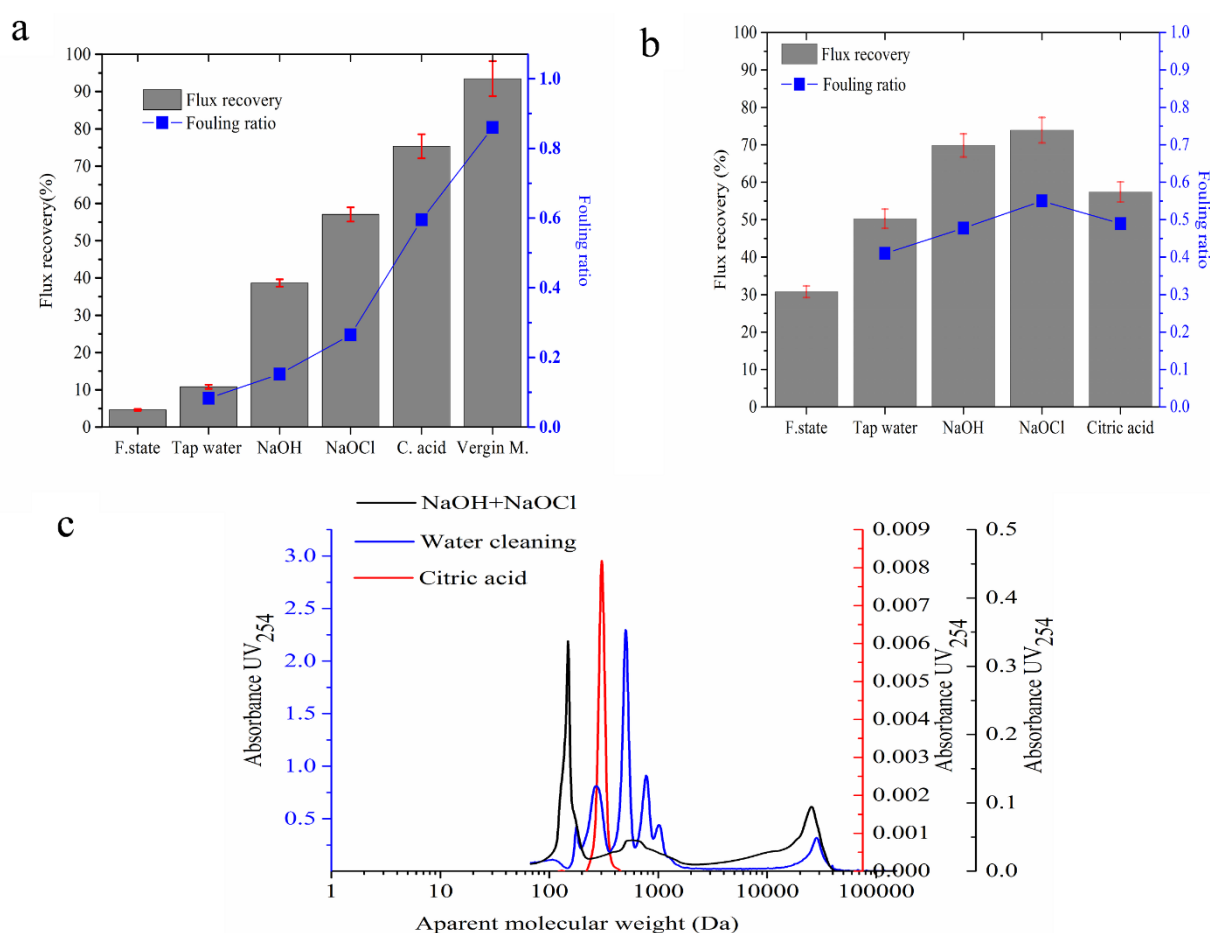

**Figure S1.** Subsequent chemical cleaning and flux recovery (a), chemical cleaning comparison with different cleaning reagents ability (b), Gel permeation chromatography responses of organic matters in foulants (c).

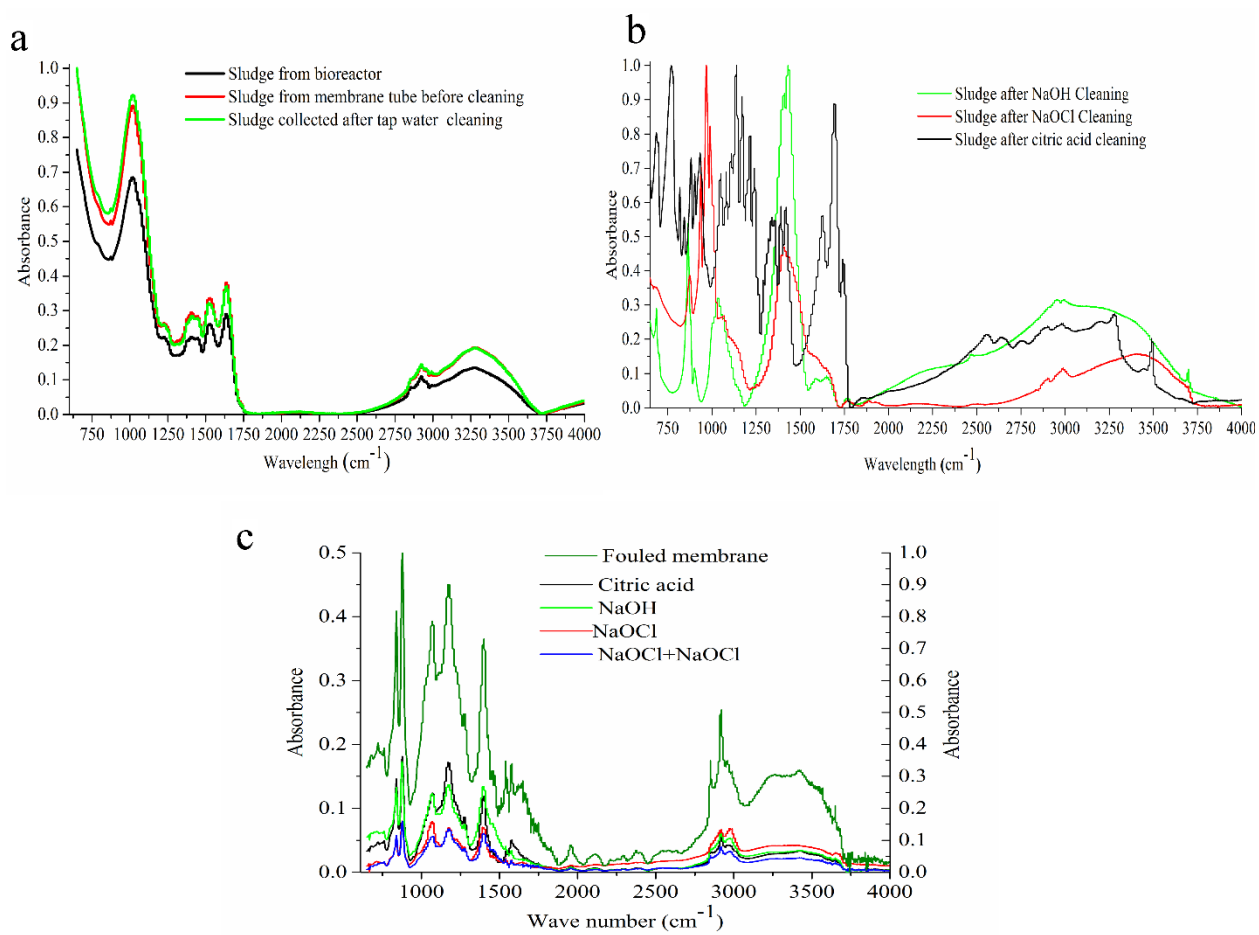

**Figure S2.** FT-IR spectra of (a): AnMBR sludge, (b): Sludge from cleaned membrane with (NaOH and NaClO), NaOH and Citric acid, (c): fouled membrane layer and Cleaned membrane with (NaOH+ NaClO), NaOH and Citric acid.

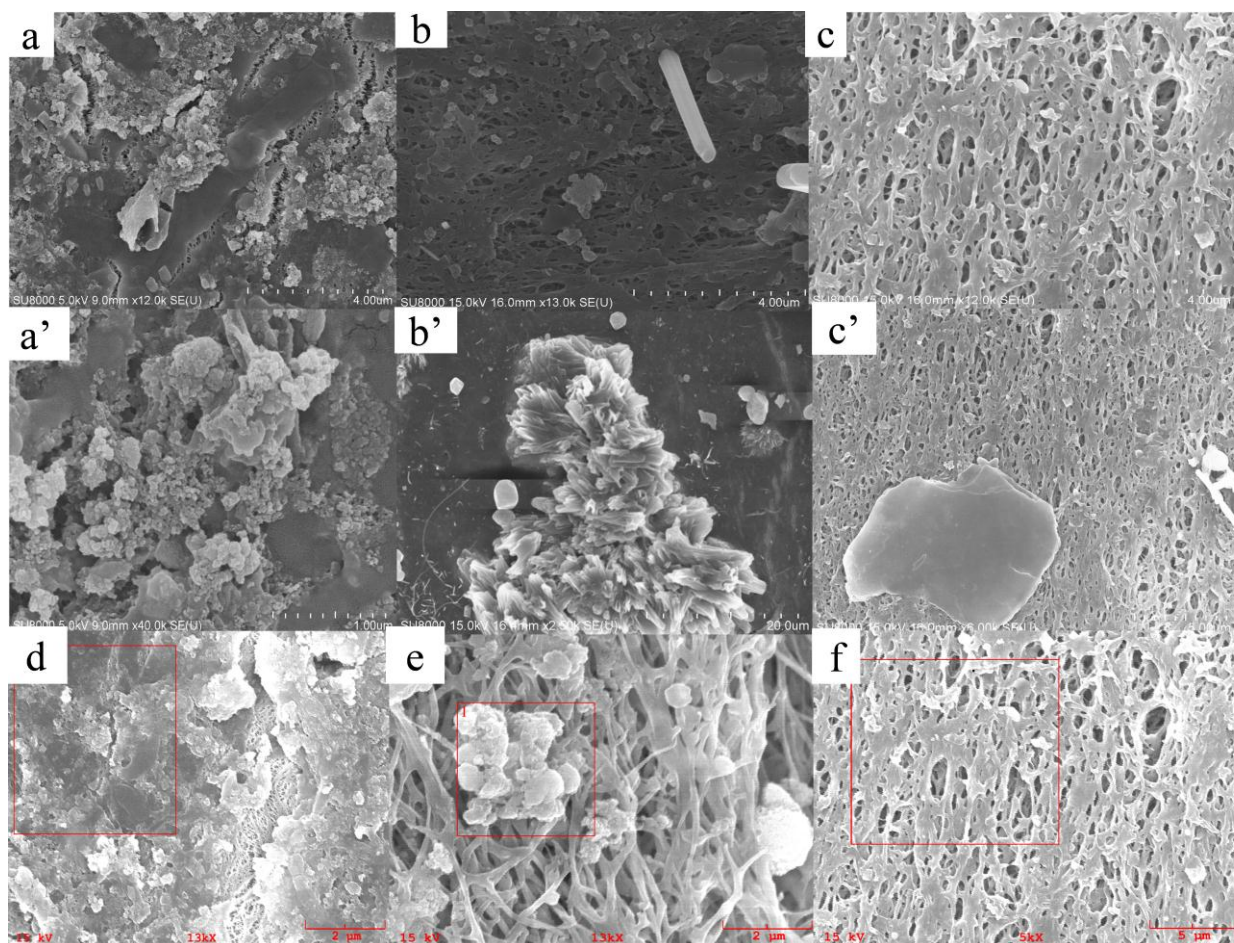

**Figure S3.** SEM of fouled membrane (a, a'), alkaline cleaned membrane (b, b') and citric acid cleaned membrane (c, c') and SEM-EDS of fouled membrane (d), alkaline cleaned membrane (e) and citric acid cleaned membrane (f).
